# Supplementary material
Source: publisher figshare collection journal article supplement (https://frontiersin.figshare.com/ndownloader/files/24382451)
Supplement: Supplementary file [file 24382451]

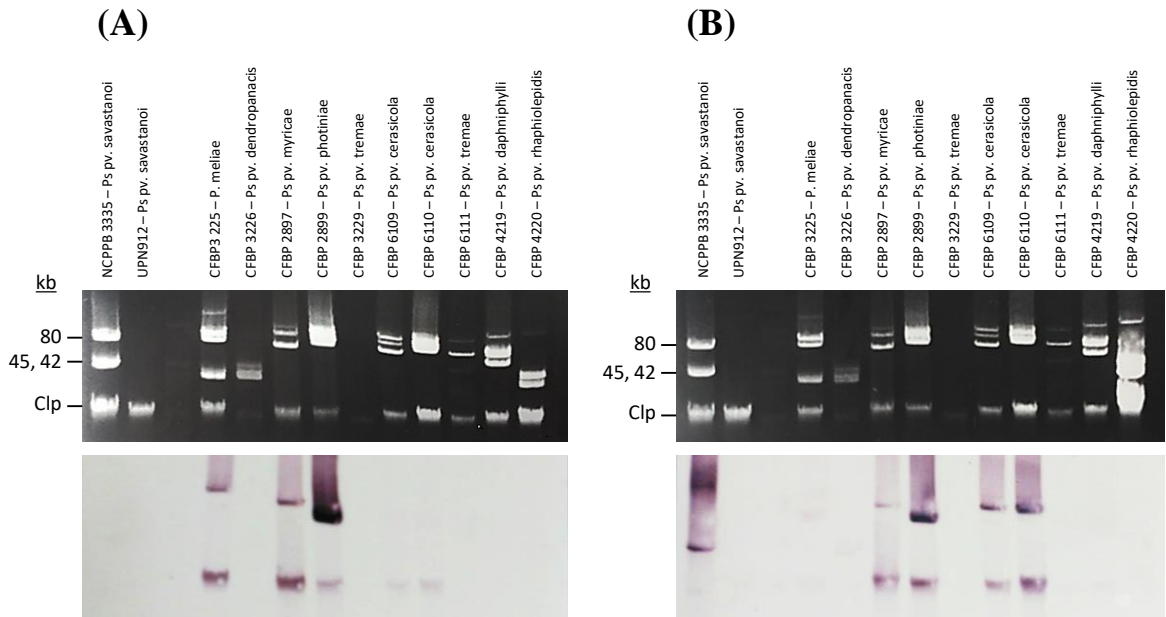

**Supplementary Figure S3. Genes *ptz* and *idi* are carried by plasmids.** Uncut native plasmids were separated by electrophoresis in 0.8 % agarose gels (upper panels), transferred to nylon membranes and subjected to Southern hybridization using internal probes for the *ptz* gene from *P. meliae* CFBP 3225 (A) and for the *idi* gene from *P. syringae* pv. savastanoi NCPBP 3335 (B). UPN912 (strain  $\Delta ABC$ ) is a plasmidless derivative of strain NCPBP 3335. Clp, chromosome and linearized plasmids.
